# Supplementary material
Source: PubMed Central journal article supplement (PMC8380591)
Supplement: 40744_2021_330_MOESM1_ESM.pdf [file 40744_2021_330_MOESM1_ESM.pdf]

## SUPPLEMENTARY MATERIAL

**Supplementary Fig. S1.** Flow chart of study design. **a)** Biomarker feature selection using machine learning and network-based methods as detailed in the methods section. **b)** A subset of 345 patients from the CERTAIN study were analyzed: 100 for identification of transcript biomarkers of non-response to TNFi therapies and 245 for cross-validation. 273 patients enrolled in the NETWORK-004 blinded prospective observational study; 244 passed initial enrollment screening, 194 completed the 3-month follow-up visit and 168 completed the 6-month follow-up visit. 87% (146/168) of patients who completed the study had complete molecular and clinical data required to perform validation analyses.

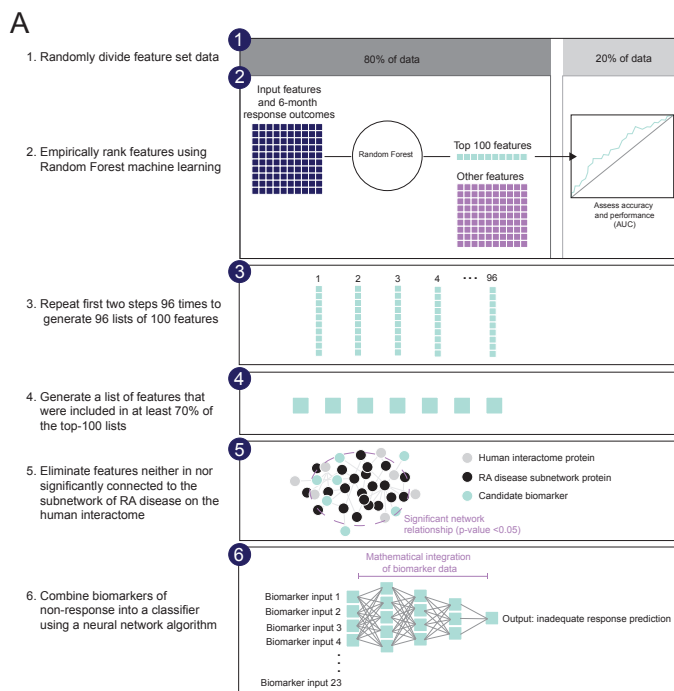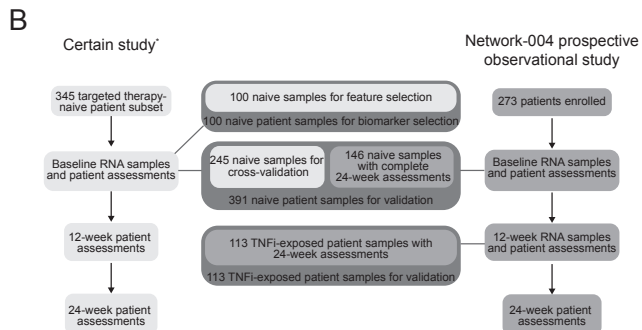

Assessments and follow-up visits indicated highlight only the subset of the CERTAIN study included in these analyses. For full details on the CERTAIN study, see Papavas, D.A., Krömer, J.M., Rees, G. et al., Design characteristics of the CORRONA CERTAIN study: a comparative effectiveness study of biologic agents for rheumatoid arthritis patients. BMC Musculoskelet Disord 15, 113 (2014).

**Supplementary Table S1.** Characteristics of patients who did not complete the NETWORK-004 prospective observational trial.

| <b>Reason for leaving trial</b>                                 | <b>Percent of patients</b>        |
|-----------------------------------------------------------------|-----------------------------------|
| Lost to follow up                                               | 9%                                |
| Screen failure                                                  | 13%                               |
| Other                                                           | 27%                               |
| Adverse Event                                                   | 4%                                |
| Withdrawal by subject                                           | 17%                               |
| Study terminated by sponsor                                     | 1%                                |
| Death                                                           | 1%                                |
| Physician decision                                              | 2%                                |
| Non-compliance with treatment                                   | 8%                                |
| Protocol violation                                              | 2%                                |
| Failed final data review; incomplete molecular or clinical data | 17%                               |
| <b>Other events (N = 29)</b>                                    | <b>Percentage of other events</b> |
| Financial problem                                               | 32%                               |
| Switched targeted therapy                                       | 13%                               |
| Protocol violation                                              | 26%                               |
| TNFi not initiated during study period                          | 19%                               |
| Not reported                                                    | 10%                               |

**Supplementary Table S2.** Odds of a patient with a molecular signature of non-response having an inadequate response according to different criteria and follow-up assessment timepoints during cross-validation.

|                                | AUC  | Odds ratio (95% CI; p-value) |
|--------------------------------|------|------------------------------|
| <b>Cross-validation, naive</b> |      |                              |
| ACR50, 6 months                | 0.66 | 3.0 (1.6-5.5; 0.0002)        |
| ACR70, 6 months                | 0.66 | 3.4 (1.6-7.1; 0.0008)        |
| CDAI LDA, 6 months             | 0.67 | 3.7 (2.2-6.4; <0.0001)       |
| CDAI remission, 6 months       | 0.67 | 3.4 (1.6-7.6; 0.0014)        |
| DAS28-CRP LDA, 6 months        | 0.64 | 2.5 (1.5-4.3; 0.0005)        |
| DAS28-CRP remission, 6 months  | 0.65 | 2.7 (1.6-4.7; 0.0003)        |

AUC = area under the curve, CI = confidence interval, ACR = American college of rheumatology, CDAI = clinical disease activity index, LDA = low disease activity, DAS28-CRP = disease activity score 28-joint count with C-Reactive protein, TNFi = tumor necrosis factor- $\alpha$  inhibitor

**Supplementary Table S3.** Comparison of baseline demographic characteristics between patients who did or did not respond to TNFi treatment according to ACR50 non-responder (NR) and responder (R) status at 6 months. Total-cohort demographic information is reported in Table 2.

| Characteristic                           | CERTAIN study feature selection (N = 100) |             |         | CERTAIN study cross-validation (N = 245) |            |         | NETWORK-004 study targeted therapy-naïve (N = 146) |            |         |
|------------------------------------------|-------------------------------------------|-------------|---------|------------------------------------------|------------|---------|----------------------------------------------------|------------|---------|
|                                          | NR (n = 69)                               | R (n = 31)  | p-value | NR (n = 170)                             | R (n = 75) | p-value | NR (n = 81)                                        | R (n = 65) | p-value |
| Age (year), mean (SD)                    | 54 (10.8)                                 | 55 (15.4)   | 0.82    | 56 (11.8)                                | 52 (13.2)  | 0.07    | 59 (12.5)                                          | 55 (15.7)  | 0.11    |
| Female, n (%)                            | 55 (79.7)                                 | 17 (54.8)   | 0.02    | 132 (77.6)                               | 47 (62.7)  | 0.02    | 62 (76.5)                                          | 53 (81.5)  | 0.60    |
| Duration of disease (year), median (IQR) | 1 (1,4)                                   | 1 (1, 7.5)  | 0.63    | 2 (1, 6)                                 | 2 (1, 5.5) | 0.76    | 1 (1,5)                                            | 1 (0, 4)   | 0.61    |
| Race, n (%)                              |                                           |             | 0.36    |                                          |            | 0.47    |                                                    |            | 0.69    |
| White                                    | 55                                        | 28          |         | 145                                      | 68         |         | 63 (77.8)                                          | 54 (83.1)  |         |
| African American                         | 8                                         | 1           |         | 11                                       | 2          |         | 12 (14.8)                                          | 4 (6.2)    |         |
| Other                                    | 20                                        | 2           |         | 30                                       | 5          |         | 6 (7.4)                                            | 7 (10.8)   |         |
| Anti-CCP positive, n (%)                 | 38 (55.1)                                 | 24 (77.4)   | 0.01    | 99 (58.2)                                | 55 (73.3)  | 0.01    | 36 (44.4)                                          | 36 (55.4)  | 0.26    |
| RF positive, n (%)                       | 51 (73.9)                                 | 25 (80.6)   | 0.61    | 117 (68.8)                               | 55 (73.3)  | 0.71    | 22 (38.6)                                          | 33 (70.2)  | 0.005   |
| Prednisone at baseline, n (%)            | 19 (27.5)                                 | 11 (35.5)   | 0.57    | 51 (30.0)                                | 13 (17.3)  | 0.06    | 12 (14.8)                                          | 25 (38.5)  | 0.02    |
| Prednisone dosage, median (IQR)          | 5 (5,10)                                  | 5 (5, 8.75) | 0.61    | 5 (5,10)                                 | 5 (5,10)   | 0.95    | 5 (5,10)                                           | 5 (4, 5)   | 0.10    |
| Current csDMARD, n (%)                   |                                           |             | ND*     |                                          |            |         |                                                    |            | ND*     |
| Methotrexate                             | 35 (50.7)                                 | 21 (67.7)   |         | 97 (57.1)                                | 41 (54.7)  | N/A*    | 64 (79.0)                                          | 56 (86.2)  |         |
| ≥2 csDMARDs                              | 5 (7.2)                                   | 2 (6.5)     |         | 27 (15.9)                                | 15 (20.0)  | N/A*    | 6 (7.4)                                            | 6 (9.2)    |         |
| None                                     | 11 (15.9)                                 | 4 (12.9)    |         | 29 (17.1)                                | 8 (10.7)   | N/A*    | 16 (19.8)                                          | 9 (13.8)   |         |
| TNFi use, n (%)                          |                                           |             | 0.92    |                                          |            | 0.28    |                                                    |            | 0.22    |
| Adalimumab                               | 26 (37.7)                                 | 10 (32.3)   |         | 67 (39.4)                                | 31 (41.3)  |         | 22 (27.2)                                          | 26 (40.0)  |         |
| Etanercept                               | 23 (33.3)                                 | 12 (38.7)   |         | 52 (30.6)                                | 24 (32.0)  |         | 19 (23.5)                                          | 12 (18.5)  |         |
| Infliximab                               | 11 (15.9)                                 | 4 (12.9)    |         | 27 (21.8)                                | 11 (14.7)  |         | 9 (11.1)                                           | 9 (13.8)   |         |
| Certolizumab pegol                       | 6 (8.7)                                   | 4 (12.9)    |         | 12 (7.1)                                 | 5 (6.7)    |         | 6 (7.4)                                            | 7 (10.8)   |         |
| Golimumab                                | 3 (4.3)                                   | 1 (3.2)     |         | 2 (1.2)                                  | 4 (5.3)    |         | 25 (30.9)                                          | 11 (16.9)  |         |

\*ND: not determined; patients receiving methotrexate and a second csDMARD are included in both categories. SD = standard deviation, IQR = interquartile range, csDMARD = conventional synthetic disease modifying antirheumatic drug, TNFi = tumor necrosis factor- $\alpha$  inhibitor, Anti-CCP = anti-cyclic citrullinated protein

**Supplementary Table S4.** Confusion matrix indicating the number of targeted therapy naïve RA patients who achieved remission at 6 months according to CDAI ( $\leq 2.8$ ) and DAS28-CRP ( $< 2.4$ ) who also had a molecular signature of non-response detected at baseline.

| <b>CDAI remission</b>      | <b>Non-responder</b> | <b>Responder</b> |
|----------------------------|----------------------|------------------|
| Signal detected            | 74                   | 4                |
| Signal not detected        | 46                   | 22               |
| <b>DAS28-CRP remission</b> | <b>Non-responder</b> | <b>Responder</b> |
| Signal detected            | 64                   | 11               |
| Signal not detected        | 33                   | 33               |

CDAI = clinical disease activity index, DAS28-CRP = disease activity score 28-joint count with C-Reactive protein

## **SUPPLEMENTARY DISCUSSION: BIOLOGY OF BIOMARKERS**

### **TNF- $\alpha$ and cytokine biosynthesis**

TNF- $\alpha$  is synthesized as a transmembrane precursor (pro-TNF- $\alpha$ ) and then proteolytically cleaved to a soluble, mature homotrimer [1, 2]. Release is primarily regulated at the transcriptional level after a stimulus triggers biosynthesis [3]. Newly formed pro-TNF- $\alpha$  is continuously secreted without the need for a second stimulus, by constitutive trafficking through the endoplasmic reticulum, Golgi and endosomal network to the cell surface where pro-TNF- $\alpha$  can be cleaved or endocytosed. Secretory and endocytic pathways modulate the number and availability of biologically active TNF- $\alpha$  molecules [4]. Secondly, binding of TNFi to transmembrane TNF- $\alpha$  results in internalization of the TNFi/TNF complex first into early endosomes [5, 6].

GOLGA1 encodes golgin-97, which is an autoantigen [7] and is essential for endosome-to-trans-Golgi network trafficking [8].

COMMD5 is localized on early endosomes and recycling endosomes, [5] colocalizing with common endosomal markers to those of TNF- $\alpha$  [9]. Recycling endosomes are specialized secretory compartments with functions that include trafficking of cytokines to cell surfaces. Furthermore, COMMD5 depletion results in re-organization of actin filaments and microtubules distribution, which impacts directional cell migration and junctions [5].

### **T and B cell homeostasis**

T cells are crucial to the pathophysiology of rheumatoid synovitis, and previous studies of the molecular pathways that identify patients who will not respond to TNFi therapies demonstrated a connection between T cell signaling and RA disease biology [10-15]. Large numbers of activated T cells can be detected in the joints of RA patients and synovial inflammation includes natural killer cells, CD4<sup>+</sup>, and CD8<sup>+</sup> T cells [16-20]. During T cell-dependent inflammatory responses, B cells can differentiate into antibody-producing plasma cells or enter follicles to form germinal centers. Dysregulation of germinal center response has been implicated in development of systemic autoimmunity [21-23]. TNF- $\alpha$  is required for germinal center organization and development in mice during normal homeostatic conditions and infections [24-27]. Germinal centers are common in inflamed synovia of RA patients and modulation of synovial inflammation by TNFi is associated with a reversal of synovial lymphoid neogenesis [28-31].

SPON2 is secreted into the extracellular matrix that is essential for initiation of immune responses, acts as an integrin ligand for inflammatory cell recruitment and T cell priming, and SPON2 knockout mice display impaired humoral responses to T cell-dependent antigens [32-34].

STOML2 is upregulated in T cell upon effector responses while down-regulation of STOML2 expression correlates with loss of sustained TCR signaling and decreased T cell activation [35, 36]. Furthermore, IL-2 production by activated T cells is reduced in STOML2 knockout mice [37]. Interleukin-2 (IL-2) is a cytokine predominantly produced by CD4<sup>+</sup> T cells and has numerous functions including promoting cell survival, activation, growth and differentiation [38]. IL-2 is a key regulator that controls the balance between regulatory and effector T cell function [38]. Peripheral blood mononuclear cells from RA patients, particularly from those with extra-articular disease, exhibit lower levels of IL-2 production [39, 40]. Treatment with low dose recombinant human IL-2 protein is being explored as a therapy in RA (NCT02467504).

BCL6 encodes a transcription factor that is the master regulator of germinal center creation and functions by recruiting co-repressor complexes to induce epigenetic changes and suppression of >1000 genes [41-43]. IL-21 signaling through STAT3 induces expression of BCL6 and mice deficient in IL21, IL21R, or STAT3 have defects in antibody responses and germinal center formation [44].

### **Response to methotrexate**

The American College of Rheumatology (ACR) treatment guidelines states the methotrexate is the preferred initial DMARD for most early RA patients [45]. Methotrexate is the most common csDMARD prescribed concurrently with TNFi therapies and, compared to TNFi therapy alone, therapy persistence is longer and development of anti-drug antibodies is reduced [46-49]. Furthermore, methotrexate may impact the biological response to TNFi therapies by altering the immunobiology of the cellular targets of TNFi inhibitors [50].

IMPDH2 is upregulated in and increases the sensitivity to methotrexate of human cancer cells [51, 52]. Furthermore, IMPDH2 expression changes occur upon methotrexate treatment of cell lines in culture [53] and methotrexate treatment induces IMPDH filament formation in cell culture [54]. Taken together, this suggests that IMPDH2 may be acting as a molecular marker that assesses methotrexate use among RA patients. Efforts to investigate IMPDH2 polymorphisms with respect to methotrexate response RA have been limited by insufficient data [55].

Alternatively, IMPDH2 has been shown to form filaments during antigen-specific T cell activation in healthy mouse spleen, thymus and pancreas [56-58]. IMPDH inhibitors (eg. azathioprine, mycophenolic acid) limit lymphocyte proliferation and are used clinically as immunosuppressants [59, 60].

## **Bone destruction**

Elevated osteoclast activity, impaired osteoblast function and osteoblast differentiation contribute to focal bone erosion development in RA [61-64]. TNF- $\alpha$  is one of the several pro-inflammatory cytokines involved in regulation of bone homeostasis by stimulating osteoclastogenesis and inhibiting osteoblast function. Treatment with TNFi therapies reduces radiographic progression [65-73]. However, disease activity correlates with radiographic progression, even among patients treated with TNFi therapies [74].

SPINT2 is upregulated in RA synovial fibroblasts compared with healthy synovial fibroblasts [75]. SPINT2 encodes the transmembrane protein HAI-2 that inhibits the hepatocyte growth factor activator (HGFA). HGFA proteolytically cleaves hepatocyte growth factor (HGF) into its active form, which regulates various physiological functions including immune regulation and viability of osteoblasts and osteoclasts [76]. Furthermore, HGF decreased circulating TNF- $\alpha$ , MCP-1, IL-1 and IL-6 levels in the serum of mice [76]. Among RA patients, elevated levels of HGF predicted more severe radiographic joint damage [77].

ATRAID is induced by the ligand all-trans retinoic acid that binds NELL-1 [78], a secreted protein that promotes bone mineralization in mice and potentiates osteoblast differentiation in an ATRAID-dependent manner [79, 80]. Furthermore, loss of ATRAID function limits therapeutic responses to widely used medications for bone diseases [81].

ALPL encodes a tissue-nonspecific alkaline phosphatase. Alkaline phosphatase is an osteoblastic marker and a predictor of bone mineral density in osteoporosis [82, 83]. ALPL is necessary for postnatal bone formation and bone deformities are related to the extent of ALPL deficiency [84, 85]. Ablation of ALPL in mice induced premature bone aging [86].

## **Unfolded protein response**

The unfolded protein response protects the cell from stresses that impact protein folding and quality and has been implicated in a growing number of inflammatory and autoimmune conditions [87, 88]. RA synovial fibroblasts are under ER stress that is further increased by TNF- $\alpha$  [89], and ER stress is buffered by activation of the unfolded protein response during



which misfolded proteins are transported from the ER to the cytosol for proteasomal degradation [90]. Furthermore, in response to TNF- $\alpha$ , autophagy stimulation increases dependence on the proteasome for RA synovial fibroblast cell viability [89].

KLHDC3 binds to and is an adaptor for the E3 ubiquitin ligase CUL2, thus targeting glycine-ended peptides for proteasomal degradation [91, 92]. The majority of proteins targeted for degradation by the KLHDC3/CUL2 are aberrant proteins with molecular characteristics that direct them for elimination [93].

NOD2 has also been linked to activation of the unfolded protein response through TRAF2 and RIP2 [94, 95].

### **Synovitis and pleiotropic pro-inflammatory signaling, including NF $\kappa$ B signaling**

Synovitis, when the joint becomes inflamed, is a hallmark of RA. Six features are master regulators of pro-inflammatory processes including transcription factors, regulators of NF- $\kappa$ B signaling, pro-inflammatory cytokines and key components of the JAK-STAT pathway. These features transmit intracellular signals that drive inflammation in RA patient synovia. These proteins also impact many of the other aspects of RA disease biology discussed above including innate immune pathways, adaptive immune cell activation, endoplasmic reticulum stress and autophagy.

NOTCH1 encodes is a ubiquitous signaling receptor involved in nearly all aspects of the cellular life cycle [96]. Additionally, it regulates inflammatory responses [97]. In RA, Notch1 signaling proteins are over-expressed in synovial tissues and Notch expression in RA synoviocytes contributes to TNF- $\alpha$ -induced proliferation [98, 99]. Furthermore, suppression of Notch signaling suppresses inflammatory arthritis and NF- $\kappa$ B proinflammatory cytokines, including TNF- $\alpha$ , IL-6, IL-12 and IFN- $\gamma$  [100-102].

NOD2, belonging to the intracellular NOD-like receptor family, detects conserved motifs in bacterial peptidoglycan and promotes their clearance through activation of a proinflammatory transcriptional program and other innate immune pathways, including autophagy and endoplasmic reticulum stress [94, 103]. In murine autoimmune arthritis, Nod2 deficiency augments Th17 responses and exacerbates arthritis symptoms [104]. Nod2 activates NF- $\kappa$ B, which requires IKK $\gamma$  and is inhibited by dominant negative mutants of I $\kappa$ B $\alpha$ , IKK $\alpha$ , IKK $\beta$ , and IKK $\gamma$  [105].

LIMK2 encodes a serine/threonine/tyrosine kinase that is phosphorylated by Rho-associated protein serine/threonine kinase (ROCK1) [106]. Treatment of cells in culture with TNF- $\alpha$  activates ROCK1 signaling [107] and LIMK2 has been identified as a potential response marker

to TNFi therapy in psoriasis [108, 109]. Enhanced ROCK activity has been reported in PBMCs and synovium from RA patients [110, 111]. Furthermore, inhibition of ROCK signaling reduced synovial inflammation in rats with collagen-induced arthritis and inhibited NFκB signaling ex vivo in PBMCs from RA patients [111].

The Janus kinases (JAK) family of intracellular tyrosine kinases (JAK1, JAK2, JAK3, and TYK2) are key components of the JAK-STAT pathway that transmit signals of many cytokines involved in the pathogenesis of numerous immune-mediated diseases [112]. The importance of JAK-STAT signaling is typified by the inhibition of JAKs for treatment of RA [113, 114].

IL1B is a proinflammatory cytokine that contributes to RA pathogenesis [115, 116]. IL-1 cytokine levels are elevated in plasma and synovial fluid of RA patients, correlate to aspects of disease activity and IL-1 receptor is the target of a targeted therapy for treatment of RA [117, 118].

ZFP36 encodes tristetraprolin (TTP), which is a negative regulatory of proinflammatory gene expression by binding to and promoting degradation of specific RNA transcripts [119]. TTP expression is elevated in RA patient synovium [120]. Transgenic mice lacking TTP displayed characteristics of erosive arthritis, phenocopying chronic administration of TNF-α, which was prevented through treatment with anti-TNF antibodies [121].

### **Apoptosis and autophagy**

Apoptosis is regulated cell death. In conjunction with FasL, TNF-α contributes to protection against apoptosis in the RA joint and promotes apoptosis of bone marrow progenitor cells that can cause anemia in chronic disease [122]. FasL or TNF-α can stimulate Fas (CD95) on fibroblasts and lymphocytes to activate an intracellular cascade of caspases that lead to apoptosis [123]. However, despite the expression of Fas in a variety of cells in RA synovial tissue, synovial cells rarely undergo apoptosis in vivo [124].

Autophagy is the regulated destruction of soluble macromolecules and organelles via lysosomes. This cellular process is critical to cellular homeostasis and contributes to inflammation in RA by controlling cell development, survival and proliferation [125, 126]. Furthermore, autophagy has implicated in generation of citrullinated peptides in RA [127] and autophagy influences resistance to TNFi therapy [128].

CFLAR encodes FLICE-inhibitory protein (FLIP) that prevents the association of caspase 8 with FADD and thus exerts an antiapoptotic effect through inhibition of Fas-mediated apoptosis. Furthermore, constitutive activation of murine FLIP causes autoimmunity in mice [129].

CDK11A encodes a cyclin dependent kinase that not only has a role in cell cycle regulation but is also required to induce autophagy [130].

### **Innate immunity**

Innate immune cells – monocytes, macrophages and dendritic cells – are involved in inflammatory responses of RA patients and drive activation of the adaptive immune system [131]. Furthermore, the continual expression of macrophage-derived cytokines in RA (TNF- $\alpha$ , IL-1 and IL-6) suggests that the innate immune system is persistently activated [132].

TRIM25 encodes a ubiquitin E3 ligase active in innate immunity and cell fate decisions [133].

TRIM25-mediated ubiquitination of the cytosolic pattern recognition receptor RIG-I has roles in early innate immunity, including negative regulation of RIG-I and modulation of p53 [134-136]. Furthermore, TRIM25 has been implicated in mediating response to ER stress, as discussed in the context of RA above in “Unfolded protein response” [137].

### **Clinical features in the MSRC**

Clinical features included among the biomarkers are sex, BMI, anti-CCP antibody seropositivity and patient global assessment. The increased risk of RA in females has been associated with pregnancy, hormonal contraceptive use, and lower levels of testosterone [138, 139]. Men may respond better to TNFi treatment than women in early, but not established RA [140-143].

Seropositive RA is characterized by abnormally elevated levels of circulating autoantibodies including anti-CCP. Measurement of anti-CCP is highly specific (98%) and sensitive (80%) for RA and anti-CCP titer correlates with erosive disease and worse prognosis [144, 145].

However, many studies have reported conflicting results regarding the association of antibody titer and response to TNFi therapy [141, 146-157], suggesting that the transcript features in the MSRC may deconvolute additional variables that give rise to these conflicting results. The patient global assessment is one of the most widely used patient reported outcomes and is a key component of many validated disease assessments. It captures complex underlying factors such as pain, depression and anxiety, inability to participate in daily activities and fibromyalgia [158]. The patient global assessment may be a better indicator of improvement after treatment than other disease measures, such as the tender and swollen joint counts [159]. Independently, each clinical feature may be poorly predictive of response to TNFi therapy when considered in a diverse patient population but help to maximize predictive power when assessed in conjunction with the unique molecular disease biology of each patient.

## SUPPLEMENTAL REFERENCES

1. Jue DM, Sherry B, Luedke C, Manogue KR, Cerami A. Processing of newly synthesized cachectin/tumor necrosis factor in endotoxin-stimulated macrophages. *Biochemistry*. 1990;29(36):8371-7.
2. Kriegler M, Perez C, DeFay K, Albert I, Lu SD. A novel form of TNF/cachectin is a cell surface cytotoxic transmembrane protein: ramifications for the complex physiology of TNF. *Cell*. 1988;53(1):45-53.
3. Falvo JV, Tsytsykova AV, Goldfeld AE. Transcriptional control of the TNF gene. *Curr Dir Autoimmun*. 2010;11:27-60.
4. Shurety W, Pagan JK, Prins JB, Stow JL. Endocytosis of uncleaved tumor necrosis factor-alpha in macrophages. *Lab Invest*. 2001;81(1):107-17.
5. Campion CG, Zaoui K, Verissimo T, Cossette S, Matsuda H, Solban N, et al. COMMD5/HCaRG Hooks Endosomes on Cytoskeleton and Coordinates EGFR Trafficking. *Cell Rep*. 2018;24(3):670-84 e7.
6. Deora A, Hegde S, Lee J, Choi CH, Chang Q, Lee C, et al. Transmembrane TNF-dependent uptake of anti-TNF antibodies. *MAbs*. 2017;9(4):680-95.
7. Griffith KJ, Chan EK, Lung CC, Hamel JC, Guo X, Miyachi K, et al. Molecular cloning of a novel 97-kd Golgi complex autoantigen associated with Sjogren's syndrome. *Arthritis Rheum*. 1997;40(9):1693-702.
8. Lu L, Tai G, Hong W. Autoantigen Golgin-97, an effector of Arl1 GTPase, participates in traffic from the endosome to the trans-golgi network. *Mol Biol Cell*. 2004;15(10):4426-43.
9. Srivastava N, Lacy P. Trafficking of TNF via recycling endosomes in neutrophils. *Allergy, Asthma & Clinical Immunology*. 2014;10(S2).
10. Gregersen PK, Silver J, Winchester RJ. The shared epitope hypothesis. An approach to understanding the molecular genetics of susceptibility to rheumatoid arthritis. *Arthritis Rheum*. 1987;30(11):1205-13.
11. Okada Y, Kim K, Han B, Pillai NE, Ong RT, Saw WY, et al. Risk for ACPA-positive rheumatoid arthritis is driven by shared HLA amino acid polymorphisms in Asian and European populations. *Hum Mol Genet*. 2014;23(25):6916-26.
12. Raychaudhuri S, Sandor C, Stahl EA, Freudenberg J, Lee HS, Jia X, et al. Five amino acids in three HLA proteins explain most of the association between MHC and seropositive rheumatoid arthritis. *Nat Genet*. 2012;44(3):291-6.

13. Okada Y, Suzuki A, Ikari K, Terao C, Kochi Y, Ohmura K, et al. Contribution of a Non-classical HLA Gene, HLA-DOA, to the Risk of Rheumatoid Arthritis. *Am J Hum Genet.* 2016;99(2):366-74.
14. Panayi GS, Lanchbury JS, Kingsley GH. The importance of the T cell in initiating and maintaining the chronic synovitis of rheumatoid arthritis. *Arthritis Rheum.* 1992;35(7):729-35.
15. Cope AP. Studies of T-cell activation in chronic inflammation. *Arthritis Res.* 2002;4 Suppl 3:S197-211.
16. Morita Y, Yamamura M, Kawashima M, Harada S, Tsuji K, Shibuya K, et al. Flow cytometric single-cell analysis of cytokine production by CD4+ T cells in synovial tissue and peripheral blood from patients with rheumatoid arthritis. *Arthritis Rheum.* 1998;41(9):1669-76.
17. Kusaba M, Honda J, Fukuda T, Oizumi K. Analysis of type 1 and type 2 T cells in synovial fluid and peripheral blood of patients with rheumatoid arthritis. *J Rheumatol.* 1998;25(8):1466-71.
18. Yamin R, Berhani O, Peleg H, Aamar S, Stein N, Gamliel M, et al. High percentages and activity of synovial fluid NK cells present in patients with advanced stage active Rheumatoid Arthritis. *Sci Rep.* 2019;9(1):1351.
19. Simon AK, Seipelt E, Sieper J. Divergent T-cell cytokine patterns in inflammatory arthritis. *Proc Natl Acad Sci U S A.* 1994;91(18):8562-6.
20. Leipe J, Grunke M, Dechant C, Reindl C, Kerzendorf U, Schulze-Koops H, et al. Role of Th17 cells in human autoimmune arthritis. *Arthritis Rheum.* 2010;62(10):2876-85.
21. Shlomchik MJ. Activating systemic autoimmunity: B's, T's, and tolls. *Curr Opin Immunol.* 2009;21(6):626-33.
22. Jackson SW, Kolhatkar NS, Rawlings DJ. B cells take the front seat: dysregulated B cell signals orchestrate loss of tolerance and autoantibody production. *Curr Opin Immunol.* 2015;33:70-7.
23. Aloisi F, Pujol-Borrell R. Lymphoid neogenesis in chronic inflammatory diseases. *Nat Rev Immunol.* 2006;6(3):205-17.
24. Popescu M, Cabrera-Martinez B, Winslow GM. TNF-alpha Contributes to Lymphoid Tissue Disorganization and Germinal Center B Cell Suppression during Intracellular Bacterial Infection. *J Immunol.* 2019;203(9):2415-24.
25. Pasparakis M, Alexopoulou L, Episkopou V, Kollias G. Immune and inflammatory responses in TNF alpha-deficient mice: a critical requirement for TNF alpha in the formation of primary B cell follicles, follicular dendritic cell networks and germinal centers, and in the maturation of the humoral immune response. *J Exp Med.* 1996;184(4):1397-411.

26. Korner H, Cook M, Riminton DS, Lemckert FA, Hoek RM, Ledermann B, et al. Distinct roles for lymphotoxin-alpha and tumor necrosis factor in organogenesis and spatial organization of lymphoid tissue. *Eur J Immunol.* 1997;27(10):2600-9.
27. Takemura S, Braun A, Crowson C, Kurtin PJ, Cofield RH, O'Fallon WM, et al. Lymphoid neogenesis in rheumatoid synovitis. *J Immunol.* 2001;167(2):1072-80.
28. Young CL, Adamson TC, 3rd, Vaughan JH, Fox RI. Immunohistologic characterization of synovial membrane lymphocytes in rheumatoid arthritis. *Arthritis Rheum.* 1984;27(1):32-9.
29. Kim HJ, Krenn V, Steinhauser G, Berek C. Plasma cell development in synovial germinal centers in patients with rheumatoid and reactive arthritis. *J Immunol.* 1999;162(5):3053-62.
30. Weyand CM, Goronzy JJ. Ectopic germinal center formation in rheumatoid synovitis. *Ann N Y Acad Sci.* 2003;987:140-9.
31. Cantaert T, Kolln J, Timmer T, van der Pouw Kraan TC, Vandooren B, Thurlings RM, et al. B lymphocyte autoimmunity in rheumatoid synovitis is independent of ectopic lymphoid neogenesis. *J Immunol.* 2008;181(1):785-94.
32. Zhang YL, Li Q, Yang XM, Fang F, Li J, Wang YH, et al. SPON2 Promotes M1-like Macrophage Recruitment and Inhibits Hepatocellular Carcinoma Metastasis by Distinct Integrin-Rho GTPase-Hippo Pathways. *Cancer Res.* 2018;78(9):2305-17.
33. Jia W, Li H, He YW. The extracellular matrix protein mindin serves as an integrin ligand and is critical for inflammatory cell recruitment. *Blood.* 2005;106(12):3854-9.
34. Li H, Oliver T, Jia W, He YW. Efficient dendritic cell priming of T lymphocytes depends on the extracellular matrix protein mindin. *EMBO J.* 2006;25(17):4097-107.
35. Kirchhof MG, Chau LA, Lemke CD, Vardhana S, Darlington PJ, Marquez ME, et al. Modulation of T cell activation by stomatin-like protein 2. *J Immunol.* 2008;181(3):1927-36.
36. Christie DA, Mitsopoulos P, Blagih J, Dunn SD, St-Pierre J, Jones RG, et al. Stomatin-like protein 2 deficiency in T cells is associated with altered mitochondrial respiration and defective CD4+ T cell responses. *J Immunol.* 2012;189(9):4349-60.
37. Mitsopoulos P, Lapohos O, Weraarpachai W, Antonicka H, Chang YH, Madrenas J. Stomatin-like protein 2 deficiency results in impaired mitochondrial translation. *PLoS One.* 2017;12(6):e0179967.
38. Nelson BH. IL-2, regulatory T cells, and tolerance. *J Immunol.* 2004;172(7):3983-8.
39. Kitas GD, Salmon M, Farr M, Gaston JS, Bacon PA. Deficient interleukin 2 production in rheumatoid arthritis: association with active disease and systemic complications. *Clin Exp Immunol.* 1988;73(2):242-9.

40. Combe B, Pope RM, Fischbach M, Darnell B, Baron S, Talal N. Interleukin-2 in rheumatoid arthritis: production of and response to interleukin-2 in rheumatoid synovial fluid, synovial tissue and peripheral blood. *Clin Exp Immunol*. 1985;59(3):520-8.
41. Yang H, Green MR. Epigenetic Programming of B-Cell Lymphoma by BCL6 and Its Genetic Deregulation. *Front Cell Dev Biol*. 2019;7:272.
42. Basso K, Saito M, Sumazin P, Margolin AA, Wang K, Lim WK, et al. Integrated biochemical and computational approach identifies BCL6 direct target genes controlling multiple pathways in normal germinal center B cells. *Blood*. 2010;115(5):975-84.
43. Ci W, Polo JM, Cerchietti L, Shaknovich R, Wang L, Yang SN, et al. The BCL6 transcriptional program features repression of multiple oncogenes in primary B cells and is deregulated in DLBCL. *Blood*. 2009;113(22):5536-48.
44. Avery DT, Deenick EK, Ma CS, Suryani S, Simpson N, Chew GY, et al. B cell-intrinsic signaling through IL-21 receptor and STAT3 is required for establishing long-lived antibody responses in humans. *J Exp Med*. 2010;207(1):155-71.
45. Singh JA, Saag KG, Bridges SL, Jr., Akl EA, Bannuru RR, Sullivan MC, et al. 2015 American College of Rheumatology Guideline for the Treatment of Rheumatoid Arthritis. *Arthritis Rheumatol*. 2016;68(1):1-26.
46. Bechman K, Oke A, Yates M, Norton S, Dennison E, Cope AP, et al. Is background methotrexate advantageous in extending TNF inhibitor drug survival in elderly patients with rheumatoid arthritis? An analysis of the British Society for Rheumatology Biologics Register. *Rheumatology (Oxford)*. 2020;59(9):2563-71.
47. Bitoun S, Nocturne G, Ly B, Krzysiek R, Roques P, Pruvost A, et al. Methotrexate and BAFF interaction prevents immunization against TNF inhibitors. *Ann Rheum Dis*. 2018;77(10):1463-70.
48. Jani M, Barton A, Warren RB, Griffiths CE, Chinoy H. The role of DMARDs in reducing the immunogenicity of TNF inhibitors in chronic inflammatory diseases. *Rheumatology (Oxford)*. 2014;53(2):213-22.
49. Finckh A, Tellenbach C, Herzog L, Scherer A, Moeller B, Ciurea A, et al. Comparative effectiveness of antitumour necrosis factor agents, biologics with an alternative mode of action and tofacitinib in an observational cohort of patients with rheumatoid arthritis in Switzerland. *RMD Open*. 2020;6(1).
50. Witte T. Methotrexate as combination partner of TNF inhibitors and tocilizumab. What is reasonable from an immunological viewpoint? *Clin Rheumatol*. 2015;34(4):629-34.

51. Penuelas S, Noe V, Ciudad CJ. Modulation of IMPDH2, survivin, topoisomerase I and vimentin increases sensitivity to methotrexate in HT29 human colon cancer cells. *FEBS J*. 2005;272(3):696-710.
52. Fellenberg J, Kunz P, Sahr H, Depeweg D. Overexpression of inosine 5'-monophosphate dehydrogenase type II mediates chemoresistance to human osteosarcoma cells. *PLoS One*. 2010;5(8):e12179.
53. Penuelas S, Noe V, Morales R, Ciudad CJ. Sensitization of human erythroleukemia K562 cells resistant to methotrexate by inhibiting IMPDH. *Med Sci Monit*. 2005;11(1):BR6-12.
54. Calise SJ, Purich DL, Nguyen T, Saleem DA, Krueger C, Yin JD, et al. 'Rod and ring' formation from IMP dehydrogenase is regulated through the one-carbon metabolic pathway. *J Cell Sci*. 2016;129(15):3042-52.
55. Kooloos WM, Wessels JA, van der Straaten T, Allaart CF, Huizinga TW, Guchelaar HJ. Functional polymorphisms and methotrexate treatment outcome in recent-onset rheumatoid arthritis. *Pharmacogenomics*. 2010;11(2):163-75.
56. Calise SJ, Abboud G, Kasahara H, Morel L, Chan EKL. Immune Response-Dependent Assembly of IMP Dehydrogenase Filaments. *Front Immunol*. 2018;9:2789.
57. Chang CC, Lin WC, Pai LM, Lee HS, Wu SC, Ding ST, et al. Cytoophidium assembly reflects upregulation of IMPDH activity. *J Cell Sci*. 2015;128(19):3550-5.
58. Gu JJ, Stegmann S, Gathy K, Murray R, Laliberte J, Ayscue L, et al. Inhibition of T lymphocyte activation in mice heterozygous for loss of the IMPDH II gene. *J Clin Invest*. 2000;106(4):599-606.
59. Leitner J, Drobits K, Pickl WF, Majdic O, Zlabinger G, Steinberger P. The effects of Cyclosporine A and azathioprine on human T cells activated by different costimulatory signals. *Immunol Lett*. 2011;140(1-2):74-80.
60. Quemeneur L, Flacher M, Gerland LM, Ffrench M, Revillard JP, Bonnefoy-Berard N. Mycophenolic acid inhibits IL-2-dependent T cell proliferation, but not IL-2-dependent survival and sensitization to apoptosis. *J Immunol*. 2002;169(5):2747-55.
61. Shim JH, Stavre Z, Gravallese EM. Bone Loss in Rheumatoid Arthritis: Basic Mechanisms and Clinical Implications. *Calcif Tissue Int*. 2018;102(5):533-46.
62. Baum R, Gravallese EM. Bone as a Target Organ in Rheumatic Disease: Impact on Osteoclasts and Osteoblasts. *Clin Rev Allergy Immunol*. 2016;51(1):1-15.
63. Karmakar S, Kay J, Gravallese EM. Bone damage in rheumatoid arthritis: mechanistic insights and approaches to prevention. *Rheum Dis Clin North Am*. 2010;36(2):385-404.



64. Panagopoulos PK, Lambrou GI. Bone erosions in rheumatoid arthritis: recent developments in pathogenesis and therapeutic implications. *J Musculoskelet Neuronal Interact.* 2018;18(3):304-19.
65. Smolen JS, Han C, Bala M, Maini RN, Kalden JR, van der Heijde D, et al. Evidence of radiographic benefit of treatment with infliximab plus methotrexate in rheumatoid arthritis patients who had no clinical improvement: a detailed subanalysis of data from the anti-tumor necrosis factor trial in rheumatoid arthritis with concomitant therapy study. *Arthritis Rheum.* 2005;52(4):1020-30.
66. Smolen JS, Van Der Heijde DM, St Clair EW, Emery P, Bathon JM, Keystone E, et al. Predictors of joint damage in patients with early rheumatoid arthritis treated with high-dose methotrexate with or without concomitant infliximab: results from the ASPIRE trial. *Arthritis Rheum.* 2006;54(3):702-10.
67. Breedveld FC, Weisman MH, Kavanaugh AF, Cohen SB, Pavelka K, van Vollenhoven R, et al. The PREMIER study: A multicenter, randomized, double-blind clinical trial of combination therapy with adalimumab plus methotrexate versus methotrexate alone or adalimumab alone in patients with early, aggressive rheumatoid arthritis who had not had previous methotrexate treatment. *Arthritis Rheum.* 2006;54(1):26-37.
68. Emery P, Deodhar A, Rigby WF, Isaacs JD, Combe B, Racewicz AJ, et al. Efficacy and safety of different doses and retreatment of rituximab: a randomised, placebo-controlled trial in patients who are biological naive with active rheumatoid arthritis and an inadequate response to methotrexate (Study Evaluating Rituximab's Efficacy in MTX iNadequate rEsponders (SERENE)). *Ann Rheum Dis.* 2010;69(9):1629-35.
69. Goekoop-Ruiterman YP, de Vries-Bouwstra JK, Allaart CF, van Zeben D, Kerstens PJ, Hazes JM, et al. Clinical and radiographic outcomes of four different treatment strategies in patients with early rheumatoid arthritis (the BeSt study): a randomized, controlled trial. *Arthritis Rheum.* 2005;52(11):3381-90.
70. Keystone EC, Kavanaugh AF, Sharp JT, Tannenbaum H, Hua Y, Teoh LS, et al. Radiographic, clinical, and functional outcomes of treatment with adalimumab (a human anti-tumor necrosis factor monoclonal antibody) in patients with active rheumatoid arthritis receiving concomitant methotrexate therapy: a randomized, placebo-controlled, 52-week trial. *Arthritis Rheum.* 2004;50(5):1400-11.
71. van der Heijde D, Klareskog L, Landewe R, Bruyn GA, Cantagrel A, Durez P, et al. Disease remission and sustained halting of radiographic progression with combination

etanercept and methotrexate in patients with rheumatoid arthritis. *Arthritis Rheum.* 2007;56(12):3928-39.

72. Weinblatt ME, Keystone EC, Furst DE, Moreland LW, Weisman MH, Birbara CA, et al. Adalimumab, a fully human anti-tumor necrosis factor alpha monoclonal antibody, for the treatment of rheumatoid arthritis in patients taking concomitant methotrexate: the ARMADA trial. *Arthritis Rheum.* 2003;48(1):35-45.

73. Weinblatt ME, Keystone EC, Furst DE, Kavanaugh AF, Chartash EK, Segurado OG. Long term efficacy and safety of adalimumab plus methotrexate in patients with rheumatoid arthritis: ARMADA 4 year extended study. *Ann Rheum Dis.* 2006;65(6):753-9.

74. Smolen JS, Choe JY, Weinblatt ME, Emery P, Keystone E, Genovese MC, et al. Pooled analysis of TNF inhibitor biosimilar studies comparing radiographic progression by disease activity states in rheumatoid arthritis. *RMD Open.* 2020;6(1).

75. Del Rey MJ, Izquierdo E, Usategui A, Gonzalo E, Blanco FJ, Acquadro F, et al. The transcriptional response of normal and rheumatoid arthritis synovial fibroblasts to hypoxia. *Arthritis Rheum.* 2010;62(12):3584-94.

76. Zhen R, Yang J, Wang Y, Li Y, Chen B, Song Y, et al. Hepatocyte growth factor improves bone regeneration via the bone morphogenetic protein2mediated NFkappaB signaling pathway. *Mol Med Rep.* 2018;17(4):6045-53.

77. Grandaunet B, Syversen SW, Hoff M, Sundan A, Haugeberg G, van Der Heijde D, et al. Association between high plasma levels of hepatocyte growth factor and progression of radiographic damage in the joints of patients with rheumatoid arthritis. *Arthritis Rheum.* 2011;63(3):662-9.

78. Zhu F, Yan W, Zhao ZL, Chai YB, Lu F, Wang Q, et al. Improved PCR-based subtractive hybridization strategy for cloning differentially expressed genes. *Biotechniques.* 2000;29(2):310-3.

79. Zou X, Shen J, Chen F, Ting K, Zheng Z, Pang S, et al. NELL-1 binds to APR3 affecting human osteoblast proliferation and differentiation. *FEBS Lett.* 2011;585(15):2410-8.

80. Desai J, Shannon ME, Johnson MD, Ruff DW, Hughes LA, Kerley MK, et al. Nell1-deficient mice have reduced expression of extracellular matrix proteins causing cranial and vertebral defects. *Hum Mol Genet.* 2006;15(8):1329-41.

81. Surface LE, Burrow DT, Li J, Park J, Kumar S, Lyu C, et al. ATRAID regulates the action of nitrogen-containing bisphosphonates on bone. *Sci Transl Med.* 2020;12(544).

82. Christenson RH. Biochemical markers of bone metabolism: an overview. *Clin Biochem.* 1997;30(8):573-93.

83. Tariq S, Tariq S, Lone KP, Khaliq S. Alkaline phosphatase is a predictor of Bone Mineral Density in postmenopausal females. *Pak J Med Sci.* 2019;35(3):749-53.
84. Mornet E. Hypophosphatasia. *Best Pract Res Clin Rheumatol.* 2008;22(1):113-27.
85. Whyte MP, Greenberg CR, Salman NJ, Bober MB, McAlister WH, Wenkert D, et al. Enzyme-replacement therapy in life-threatening hypophosphatasia. *N Engl J Med.* 2012;366(10):904-13.
86. Liu W, Zhang L, Xuan K, Hu C, Liu S, Liao L, et al. Alpl prevents bone ageing sensitivity by specifically regulating senescence and differentiation in mesenchymal stem cells. *Bone Res.* 2018;6:27.
87. Smith JA. Regulation of Cytokine Production by the Unfolded Protein Response; Implications for Infection and Autoimmunity. *Front Immunol.* 2018;9:422.
88. Zhang K, Kaufman RJ. From endoplasmic-reticulum stress to the inflammatory response. *Nature.* 2008;454(7203):455-62.
89. Connor AM, Mahomed N, Gandhi R, Keystone EC, Berger SA. TNFalpha modulates protein degradation pathways in rheumatoid arthritis synovial fibroblasts. *Arthritis Res Ther.* 2012;14(2):R62.
90. Hetz C. The unfolded protein response: controlling cell fate decisions under ER stress and beyond. *Nat Rev Mol Cell Biol.* 2012;13(2):89-102.
91. Koren I, Timms RT, Kula T, Xu Q, Li MZ, Elledge SJ. The Eukaryotic Proteome Is Shaped by E3 Ubiquitin Ligases Targeting C-Terminal Degrons. *Cell.* 2018;173(7):1622-35 e14.
92. Mahrour N, Redwine WB, Florens L, Swanson SK, Martin-Brown S, Bradford WD, et al. Characterization of Cullin-box sequences that direct recruitment of Cul2-Rbx1 and Cul5-Rbx2 modules to Elongin BC-based ubiquitin ligases. *J Biol Chem.* 2008;283(12):8005-13.
93. Lin HC, Yeh CW, Chen YF, Lee TT, Hsieh PY, Rusnac DV, et al. C-Terminal End-Directed Protein Elimination by CRL2 Ubiquitin Ligases. *Mol Cell.* 2018;70(4):602-13 e3.
94. Negroni A, Pierdomenico M, Cucchiara S, Stronati L. NOD2 and inflammation: current insights. *J Inflamm Res.* 2018;11:49-60.
95. Urano F, Wang X, Bertolotti A, Zhang Y, Chung P, Harding HP, et al. Coupling of stress in the ER to activation of JNK protein kinases by transmembrane protein kinase IRE1. *Science.* 2000;287(5453):664-6.
96. Fiuza UM, Arias AM. Cell and molecular biology of Notch. *J Endocrinol.* 2007;194(3):459-74.
97. Shang Y, Smith S, Hu X. Role of Notch signaling in regulating innate immunity and inflammation in health and disease. *Protein Cell.* 2016;7(3):159-74.

98. Yabe Y, Matsumoto T, Tsurumoto T, Shindo H. Immunohistological localization of Notch receptors and their ligands Delta and Jagged in synovial tissues of rheumatoid arthritis. *J Orthop Sci.* 2005;10(6):589-94.
99. Ando K, Kanazawa S, Tetsuka T, Ohta S, Jiang X, Tada T, et al. Induction of Notch signaling by tumor necrosis factor in rheumatoid synovial fibroblasts. *Oncogene.* 2003;22(49):7796-803.
100. Kijima M, Iwata A, Maekawa Y, Uehara H, Izumi K, Kitamura A, et al. Jagged1 suppresses collagen-induced arthritis by indirectly providing a negative signal in CD8+ T cells. *J Immunol.* 2009;182(6):3566-72.
101. Outtz HH, Wu JK, Wang X, Kitajewski J. Notch1 deficiency results in decreased inflammation during wound healing and regulates vascular endothelial growth factor receptor-1 and inflammatory cytokine expression in macrophages. *J Immunol.* 2010;185(7):4363-73.
102. Liu Z, Chen J, Mirando AJ, Wang C, Zuscik MJ, O'Keefe RJ, et al. A dual role for NOTCH signaling in joint cartilage maintenance and osteoarthritis. *Sci Signal.* 2015;8(386):ra71.
103. Caruso R, Warner N, Inohara N, Nunez G. NOD1 and NOD2: signaling, host defense, and inflammatory disease. *Immunity.* 2014;41(6):898-908.
104. Napier RJ, Lee EJ, Vance EE, Snow PE, Samson KA, Dawson CE, et al. Nod2 Deficiency Augments Th17 Responses and Exacerbates Autoimmune Arthritis. *J Immunol.* 2018;201(7):1889-98.
105. Ogura Y, Inohara N, Benito A, Chen FF, Yamaoka S, Nunez G. Nod2, a Nod1/Apaf-1 family member that is restricted to monocytes and activates NF-kappaB. *J Biol Chem.* 2001;276(7):4812-8.
106. Maekawa M, Ishizaki T, Boku S, Watanabe N, Fujita A, Iwamatsu A, et al. Signaling from Rho to the actin cytoskeleton through protein kinases ROCK and LIM-kinase. *Science.* 1999;285(5429):895-8.
107. Yang L, Tang L, Dai F, Meng G, Yin R, Xu X, et al. Raf-1/CK2 and RhoA/ROCK signaling promote TNF-alpha-mediated endothelial apoptosis via regulating vimentin cytoskeleton. *Toxicology.* 2017;389:74-84.
108. Krawczyk A, Strzalka-Mrozik B, Grabarek B, Wcislo-Dziadecka D, Kimsa-Dudek M, Kruszniewska-Rajs C, et al. mRNA level of ROCK1, RHOA, and LIMK2 as genes associated with apoptosis in evaluation of effectiveness of adalimumab treatment. *Pharmacol Rep.* 2020;72(2):389-99.
109. Zaba LC, Suarez-Farinas M, Fuentes-Duculan J, Nograles KE, Guttman-Yassky E, Cardinale I, et al. Effective treatment of psoriasis with etanercept is linked to suppression of IL-

- 17 signaling, not immediate response TNF genes. *J Allergy Clin Immunol.* 2009;124(5):1022-10 e1-395.
110. Pernis AB, Ricker E, Weng CH, Rozo C, Yi W. Rho Kinases in Autoimmune Diseases. *Annu Rev Med.* 2016;67:355-74.
111. He Y, Xu H, Liang L, Zhan Z, Yang X, Yu X, et al. Antiinflammatory effect of Rho kinase blockade via inhibition of NF-kappaB activation in rheumatoid arthritis. *Arthritis Rheum.* 2008;58(11):3366-76.
112. O'Shea JJ, Schwartz DM, Villarino AV, Gadina M, McInnes IB, Laurence A. The JAK-STAT pathway: impact on human disease and therapeutic intervention. *Annu Rev Med.* 2015;66:311-28.
113. Kim HO. Development of JAK inhibitors for the treatment of immune-mediated diseases: kinase-targeted inhibitors and pseudokinase-targeted inhibitors. *Arch Pharm Res.* 2020;43(11):1173-86.
114. Malemud CJ. The role of the JAK/STAT signal pathway in rheumatoid arthritis. *Ther Adv Musculoskelet Dis.* 2018;10(5-6):117-27.
115. Dayer JM, Oliviero F, Punzi L. A Brief History of IL-1 and IL-1 Ra in Rheumatology. *Front Pharmacol.* 2017;8:293.
116. Kay J, Calabrese L. The role of interleukin-1 in the pathogenesis of rheumatoid arthritis. *Rheumatology (Oxford).* 2004;43 Suppl 3:iii2-iii9.
117. Eastgate JA, Symons JA, Wood NC, Grinlinton FM, di Giovine FS, Duff GW. Correlation of plasma interleukin 1 levels with disease activity in rheumatoid arthritis. *Lancet.* 1988;2(8613):706-9.
118. Mertens M, Singh JA. Anakinra for rheumatoid arthritis. *Cochrane Database Syst Rev.* 2009(1):CD005121.
119. Brooks SA, Blackshear PJ. Tristetraprolin (TTP): interactions with mRNA and proteins, and current thoughts on mechanisms of action. *Biochim Biophys Acta.* 2013;1829(6-7):666-79.
120. Ross EA, Naylor AJ, O'Neil JD, Crowley T, Ridley ML, Crowe J, et al. Treatment of inflammatory arthritis via targeting of tristetraprolin, a master regulator of pro-inflammatory gene expression. *Ann Rheum Dis.* 2017;76(3):612-9.
121. Taylor GA, Carballo E, Lee DM, Lai WS, Thompson MJ, Patel DD, et al. A pathogenetic role for TNF alpha in the syndrome of cachexia, arthritis, and autoimmunity resulting from tristetraprolin (TTP) deficiency. *Immunity.* 1996;4(5):445-54.
122. Liu H, Pope RM. The role of apoptosis in rheumatoid arthritis. *Curr Opin Pharmacol.* 2003;3(3):317-22.

123. Firestein GS, Yeo M, Zvaifler NJ. Apoptosis in rheumatoid arthritis synovium. *J Clin Invest.* 1995;96(3):1631-8.
124. Matsumoto S, Muller-Ladner U, Gay RE, Nishioka K, Gay S. Ultrastructural demonstration of apoptosis, Fas and Bcl-2 expression of rheumatoid synovial fibroblasts. *J Rheumatol.* 1996;23(8):1345-52.
125. Matsuzawa-Ishimoto Y, Hwang S, Cadwell K. Autophagy and Inflammation. *Annu Rev Immunol.* 2018;36:73-101.
126. Vomero M, Barbati C, Colasanti T, Perricone C, Novelli L, Ceccarelli F, et al. Autophagy and Rheumatoid Arthritis: Current Knowledges and Future Perspectives. *Front Immunol.* 2018;9:1577.
127. Ireland JM, Unanue ER. Autophagy in antigen-presenting cells results in presentation of citrullinated peptides to CD4 T cells. *J Exp Med.* 2011;208(13):2625-32.
128. Dai Y, Ding J, Yin W, He Y, Yu F, Ye C, et al. Increased Autophagy Enhances the Resistance to Tumor Necrosis Factor-Alpha Treatment in Rheumatoid Arthritis Human Fibroblast-Like Synovial Cell. *Biomed Res Int.* 2018;2018:4941027.
129. Ewald F, Annemann M, Pils MC, Plaza-Sirvent C, Neff F, Erck C, et al. Constitutive expression of murine c-FLIPR causes autoimmunity in aged mice. *Cell Death Dis.* 2014;5:e1168.
130. Wilkinson S, Croft DR, O'Prey J, Meedendorp A, O'Prey M, Dufes C, et al. The cyclin-dependent kinase PITSLRE/CDK11 is required for successful autophagy. *Autophagy.* 2011;7(11):1295-301.
131. Edilova MI, Akram A, Abdul-Sater AA. Innate immunity drives pathogenesis of rheumatoid arthritis. *Biomed J.* 2020.
132. Gierut A, Perlman H, Pope RM. Innate immunity and rheumatoid arthritis. *Rheum Dis Clin North Am.* 2010;36(2):271-96.
133. Heikel G, Choudhury NR, Michlewski G. The role of Trim25 in development, disease and RNA metabolism. *Biochem Soc Trans.* 2016;44(4):1045-50.
134. Martin-Vicente M, Medrano LM, Resino S, Garcia-Sastre A, Martinez I. TRIM25 in the Regulation of the Antiviral Innate Immunity. *Front Immunol.* 2017;8:1187.
135. Zhang P, Elabd S, Hammer S, Solozobova V, Yan H, Bartel F, et al. TRIM25 has a dual function in the p53/Mdm2 circuit. *Oncogene.* 2015;34(46):5729-38.
136. Inn KS, Gack MU, Tokunaga F, Shi M, Wong LY, Iwai K, et al. Linear ubiquitin assembly complex negatively regulates RIG-I- and TRIM25-mediated type I interferon induction. *Mol Cell.* 2011;41(3):354-65.

137. Liu Y, Tao S, Liao L, Li Y, Li H, Li Z, et al. TRIM25 promotes the cell survival and growth of hepatocellular carcinoma through targeting Keap1-Nrf2 pathway. *Nat Commun.* 2020;11(1):348.
138. Gibofsky A. Overview of epidemiology, pathophysiology, and diagnosis of rheumatoid arthritis. *The American journal of managed care.* 2012;18(13 Suppl):S295-302.
139. Silman AJ, Pearson JE. Epidemiology and genetics of rheumatoid arthritis. *Arthritis Res.* 2002;4 Suppl 3(Suppl 3):S265-S72.
140. Jawaheer D, Olsen J, Hetland ML. Sex differences in response to anti-tumor necrosis factor therapy in early and established rheumatoid arthritis -- results from the DANBIO registry. *J Rheumatol.* 2012;39(1):46-53.
141. Hyrich KL, Watson KD, Silman AJ, Symmons DP, British Society for Rheumatology Biologics R. Predictors of response to anti-TNF-alpha therapy among patients with rheumatoid arthritis: results from the British Society for Rheumatology Biologics Register. *Rheumatology (Oxford).* 2006;45(12):1558-65.
142. Burmester GR, Ferraccioli G, Flipo RM, Monteagudo-Saez I, Unnebrink K, Kary S, et al. Clinical remission and/or minimal disease activity in patients receiving adalimumab treatment in a multinational, open-label, twelve-week study. *Arthritis Rheum.* 2008;59(1):32-41.
143. Kleinert S, Tony HP, Krause A, Feuchtenberger M, Wassenberg S, Richter C, et al. Impact of patient and disease characteristics on therapeutic success during adalimumab treatment of patients with rheumatoid arthritis: data from a German noninterventional observational study. *Rheumatol Int.* 2012;32(9):2759-67.
144. Lewis MJ, Barnes MR, Blighe K, Goldmann K, Rana S, Hackney JA, et al. Molecular Portraits of Early Rheumatoid Arthritis Identify Clinical and Treatment Response Phenotypes. *Cell Rep.* 2019;28(9):2455-70 e5.
145. Aggarwal R, Liao K, Nair R, Ringold S, Costenbader KH. Anti-citrullinated peptide antibody assays and their role in the diagnosis of rheumatoid arthritis. *Arthritis Rheum.* 2009;61(11):1472-83.
146. Vasilopoulos Y, Bagiatis V, Stamatopoulou D, Zisopoulos D, Alexiou I, Sarafidou T, et al. Association of anti-CCP positivity and carriage of TNFR11 susceptibility variant with anti-TNF-alpha response in rheumatoid arthritis. *Clin Exp Rheumatol.* 2011;29(4):701-4.
147. Tanaka Y, Takeuchi T, Inoue E, Saito K, Sekiguchi N, Sato E, et al. Retrospective clinical study on the notable efficacy and related factors of infliximab therapy in a rheumatoid arthritis management group in Japan: one-year clinical outcomes (RECONFIRM-2). *Mod Rheumatol.* 2008;18(2):146-52.

148. Potter C, Hyrich KL, Tracey A, Lunt M, Plant D, Symmons DP, et al. Association of rheumatoid factor and anti-cyclic citrullinated peptide positivity, but not carriage of shared epitope or PTPN22 susceptibility variants, with anti-tumour necrosis factor response in rheumatoid arthritis. *Ann Rheum Dis*. 2009;68(1):69-74.
149. Mancarella L, Bobbio-Pallavicini F, Ceccarelli F, Falappone PC, Ferrante A, Malesci D, et al. Good clinical response, remission, and predictors of remission in rheumatoid arthritis patients treated with tumor necrosis factor-alpha blockers: the GISEA study. *J Rheumatol*. 2007;34(8):1670-3.
150. Klaasen R, Cantaert T, Wijbrandts CA, Teitsma C, Gerlag DM, Out TA, et al. The value of rheumatoid factor and anti-citrullinated protein antibodies as predictors of response to infliximab in rheumatoid arthritis: an exploratory study. *Rheumatology (Oxford)*. 2011;50(8):1487-93.
151. Cuchacovich M, Catalan D, Wainstein E, Gatica H, Soto L, Aravena O, et al. Basal anti-cyclic citrullinated peptide (anti-CCP) antibody levels and a decrease in anti-CCP titres are associated with clinical response to adalimumab in rheumatoid arthritis. *Clin Exp Rheumatol*. 2008;26(6):1067-73.
152. Canhao H, Rodrigues AM, Mourao AF, Martins F, Santos MJ, Canas-Silva J, et al. Comparative effectiveness and predictors of response to tumour necrosis factor inhibitor therapies in rheumatoid arthritis. *Rheumatology (Oxford)*. 2012;51(11):2020-6.
153. Braun-Moscovici Y, Markovits D, Zinder O, Schapira D, Rozin A, Ehrenburg M, et al. Anti-cyclic citrullinated protein antibodies as a predictor of response to anti-tumor necrosis factor-alpha therapy in patients with rheumatoid arthritis. *J Rheumatol*. 2006;33(3):497-500.
154. Soto L, Sabugo F, Catalan D, Wurmman P, Cermenatti T, Gatica H, et al. The presence of anti-citrullinated protein antibodies (ACPA) does not affect the clinical response to adalimumab in a group of RA patients with the tumor necrosis factor (TNF) alpha-308 G/G promoter polymorphism. *Clin Rheumatol*. 2011;30(3):391-5.
155. Lequerre T, Jouen F, Brazier M, Clayssens S, Klemmer N, Menard JF, et al. Autoantibodies, metalloproteinases and bone markers in rheumatoid arthritis patients are unable to predict their responses to infliximab. *Rheumatology (Oxford)*. 2007;46(3):446-53.
156. Bobbio-Pallavicini F, Caporali R, Alpini C, Avalle S, Epis OM, Klersy C, et al. High IgA rheumatoid factor levels are associated with poor clinical response to tumour necrosis factor alpha inhibitors in rheumatoid arthritis. *Ann Rheum Dis*. 2007;66(3):302-7.
157. Bruns A, Nicaise-Roland P, Hayem G, Palazzo E, Dieude P, Grootenboer-Mignot S, et al. Prospective cohort study of effects of infliximab on rheumatoid factor, anti-cyclic citrullinated



peptide antibodies and antinuclear antibodies in patients with long-standing rheumatoid arthritis. *Joint Bone Spine*. 2009;76(3):248-53.

158. Challa DNV, Crowson CS, Davis JM, 3rd. The Patient Global Assessment of Disease Activity in Rheumatoid Arthritis: Identification of Underlying Latent Factors. *Rheumatol Ther*. 2017;4(1):201-8.

159. Burmester GR, Rigby WF, van Vollenhoven RF, Kay J, Rubbert-Roth A, Blanco R, et al. Tocilizumab combination therapy or monotherapy or methotrexate monotherapy in methotrexate-naive patients with early rheumatoid arthritis: 2-year clinical and radiographic results from the randomised, placebo-controlled FUNCTION trial. *Ann Rheum Dis*. 2017;76(7):1279-84.
